# Supplementary material for: Effects of Management Practices on Soil Properties and Plant Nutrition in Hay Meadows in Picos de Europa
Source: MDPI journal article supplement (doi:10.3390/environments8050038), 2021-04-25
Supplement: s1 [file s1]

**Table S1.** Approximate chronogram of the management in the meadows. Usual dates for grazing, mowing and fertilization seasons. Cells in blue indicate grazing season, cells in green indicate mowing season and cells with an “X” indicate fertilization season.

[illegible]

**Table S2.** Correlation coefficients for the 18 variables (edaphic and foliar) and the first two principal components (44.2% of the total variance explained) and communality estimates (the proportion of each variable's variance that can be explained by the principal components) from a principal component analysis of the correlation matrix of the traits.

| Variables                      | Component 1 | Component 2 | Communalities |
|--------------------------------|-------------|-------------|---------------|
| Edaphic Variables <sup>1</sup> |             |             |               |
| pH                             | -0.08       | -0.81       | 0.67          |
| OM                             | 0.44        | 0.27        | 0.27          |
| N                              | 0.11        | 0.59        | 0.36          |
| Ca                             | -0.17       | -0.44       | 0.22          |
| K                              | 0.58        | -0.31       | 0.43          |
| Mg                             | 0.45        | -0.60       | 0.56          |
| Foliar nutrients               |             |             |               |
| Grasses                        |             |             |               |
| (g kg <sup>-1</sup> )          |             |             |               |
| FP                             | 0.73        | 0.25        | 0.59          |
| FCa                            | -0.06       | 0.30        | 0.09          |
| FMg                            | 0.60        | 0.06        | 0.37          |
| FK                             | 0.53        | 0.45        | 0.49          |
| Legumes                        |             |             |               |
| (g kg <sup>-1</sup> )          |             |             |               |
| FP                             | 0.80        | -0.09       | 0.65          |
| FCa                            | -0.16       | 0.67        | 0.47          |
| FMg                            | -0.33       | 0.60        | 0.47          |
| FK                             | 0.81        | 0.09        | 0.66          |
| Other families                 |             |             |               |
| (g kg <sup>-1</sup> )          |             |             |               |
| FP                             | 0.67        | -0.17       | 0.47          |
| FCa                            | 0.26        | 0.50        | 0.32          |
| FMg                            | 0.38        | 0.59        | 0.50          |
| FK                             | 0.63        | 0.01        | 0.39          |

<sup>1</sup>Edaphic variables: pH, OM (organic matter, %), N (Nitrogen, %), Ca, K and Mg (cmol+ kg<sup>-1</sup>)
