# Supplementary material for: Effects of Management Practices on Soil Properties and Plant Nutrition in Hay Meadows in Picos de Europa
Source: MDPI journal article supplement (doi:10.3390/environments8050038), 2021-04-25
Supplement: s1 [file s1]

**Table S5.** Results of T-test and level of significance comparing foliar nutrients concentrations with values given by Epstein.

|            | N               |                   |                 | P                |                   |                   | Ca                 | Mg                |                 | K                  |                    |                    |
|------------|-----------------|-------------------|-----------------|------------------|-------------------|-------------------|--------------------|-------------------|-----------------|--------------------|--------------------|--------------------|
|            | Grasses         | Legumes           | Other Families  | Grasses          | Legumes           | Other Families    | Grasses            | Grasses           | Other Families  | Grasses            | Legumes            | Other Families     |
| T-test (t) | 2.202, p < 0.05 | 10.302, p < 0.001 | 4.001, p < 0.01 | 9.920, p < 0.001 | 13.845, p < 0.001 | 12.990, p < 0.001 | -11.858, p < 0.001 | 15.402, p < 0.001 | 2.022, p ≥ 0.05 | -28.381, p < 0.001 | -29.751, p < 0.001 | -36.521, p < 0.001 |

Test results that were not significant are not shown in the table. Positive values of t indicate significantly higher values than those given by Epstein and negative values of T indicate significantly lower values.
