# Supplementary material for: Effects of Management Practices on Soil Properties and Plant Nutrition in Hay Meadows in Picos de Europa
Source: MDPI journal article supplement (doi:10.3390/environments8050038), 2021-04-25
Supplement: s1 [file s1]

**Table S4.** Pearson correlations among soil properties and nutrients concentrations in grasses, legumes and other families. \*: significant at level  $P < 0.05$ ; \*\*: significant at level  $P < 0.01$ .

|          | pH<br>(H <sub>2</sub> O) | OM %    | N %    | C/N      | Exchangeable Cations<br>(mol kg <sup>-1</sup> ) |        |         | Ca : Mg  | Exchangeabl<br>eA l<br>(mol kg <sup>-1</sup> ) |
|----------|--------------------------|---------|--------|----------|-------------------------------------------------|--------|---------|----------|------------------------------------------------|
|          |                          |         |        |          | Ca                                              | K      | Mg      |          |                                                |
| Grasses  |                          |         |        |          |                                                 |        |         |          |                                                |
| (%)      |                          |         |        |          |                                                 |        |         |          |                                                |
| P        |                          |         |        |          |                                                 |        |         |          |                                                |
| Ca       |                          |         | 0.446* | -0.557** |                                                 |        |         |          |                                                |
| Mg       |                          |         |        |          |                                                 |        | 0.515** | -0.547** |                                                |
| K        |                          | 0.460*  |        |          |                                                 |        |         |          |                                                |
| Legumes  |                          |         |        |          |                                                 |        |         |          |                                                |
| (%)      |                          |         |        |          |                                                 |        |         |          |                                                |
| P        |                          |         |        |          |                                                 |        |         | -0.470*  |                                                |
| Ca       |                          |         |        |          |                                                 |        | -0.411* |          |                                                |
| Mg       |                          |         |        |          |                                                 |        |         | 0.436*   | 0.408*                                         |
| K        |                          | 0.523** |        |          |                                                 | 0.451* |         |          |                                                |
| Other    |                          |         |        |          |                                                 |        |         |          |                                                |
| families |                          |         |        |          |                                                 |        |         |          |                                                |
| (%)      |                          |         |        |          |                                                 |        |         |          |                                                |
| P        |                          |         |        |          |                                                 |        |         | -0.474*  |                                                |
| Ca       | -0.421*                  |         |        |          |                                                 |        |         |          | 0.422*                                         |
| Mg       | -0.419*                  |         |        |          | -0.510**                                        |        |         |          |                                                |
| K        |                          | 0.446*  |        |          |                                                 | 0.472* |         |          |                                                |
