# Supplementary material for: Effects of Management Practices on Soil Properties and Plant Nutrition in Hay Meadows in Picos de Europa
Source: MDPI journal article supplement (doi:10.3390/environments8050038), 2021-04-25
Supplement: s1 [file s1]

**Table S3.** Mean values of variables affected by tractor or fertilization separately.

| Management    |                          | pH               | Sand (%)           | FPG1 (%)         | FKG2 (%)         |
|---------------|--------------------------|------------------|--------------------|------------------|------------------|
| Mowing        | Only reaper              | 6.2 a<br>(0.38)  |                    |                  |                  |
|               | Only tractor             | 5.9 ab<br>(0.17) |                    |                  |                  |
|               | Reaper and tractor       | 5.6 b<br>(0.33)  |                    |                  |                  |
| Fertilization | Organic fert             |                  | 65.9 a<br>(10.87)  | 0.7 ab<br>(2.63) | 0.6 ab<br>(0.53) |
|               | Organic + Inorganic fert |                  | 54.7 ab<br>(10.02) | 1 a<br>(3.07)    | 0.6 a<br>(0.46)  |
|               | No fert                  |                  | 45.5 b<br>(7.6)    | 0.6 b<br>(1.14)  | 0.5 b<br>(0.84)  |
|               |                          |                  |                    |                  |                  |

Statistical significance is indicated with different letters, letter “a” indicating significantly greater values than letter “b”. Means in a column with no common letters are significantly different, Tukey test,  $p < 0.05$ . Standard deviations are shown in brackets. <sup>1</sup>Foliar content of P in grasses;

<sup>2</sup>Foliar content of K in grasses.
